# Supplementary material for: Investigating the Evolution of Ingroup Favoritism Using a Minimal Group Interaction Paradigm: The Effects of Inter- and Intragroup Interdependence
Source: PLoS One. 2016 Nov 16;11(11):e0165974. doi: 10.1371/journal.pone.0165974 (PMC5113042; doi:10.1371/journal.pone.0165974)
Supplement: S1 File — (XLSX) [file pone.0165974.s001.xlsx]

## Sheet: Sheet1
2013 data file	vpldata2014wider-201697.Rdata .csv
game	The game participants were part of; there were 74 different games. Nested.
id	Unique code for each participant
roundno	Each participant awarded tokens in each of 40 rounds, this var captures the round number
equalitycondition	Three statuses - equal, high and low. Participants randomly assigned to one of these.
normcondition	Three different norms (competition, fairness, no-norm) were primed; assigned randomly
groupness	A randomly assigned condition: participants were either given a group designation or individual
tokenstoingroup	A binary variable recording if the token in each round was awarded to the ingroup or not
tokenstooutgroup	A binary variable recording if the token in each round was awarded to the outgroup or not
tokenstoself	A binary variable recording if the token in each round was awarded to self or not
roundcat	A recategorization of the roundno variable to record waves of 8 rounds i.e. data was cumulated over 8 rounds. The cumulation is reflected in the ingroupfav and selfgiving variables
ingroupfav	Proportion of tokens given to ingroup in a wave of 8 rounds
selfgiving	Proportion of tokens given to self in a wave of 8 rounds
2014 data file	vpldata2014revwider-201697.Rdata .csv
game	The game participants were part of; there were 16 different games. Nested.
id	Unique code for each participant
roundno	Each participant awarded tokens in each of 40 rounds, this var captures the round number
equalitycondition	Three statuses - equal, high and low. Participants randomly assigned to one of these.
groupness	A randomly assigned condition: participants were either given a group designation or individual
tokenstoingroup	A binary variable recording if the token in each round was awarded to the ingroup or not
tokenstooutgroup	A binary variable recording if the token in each round was awarded to the outgroup or not
tokenstoself	A binary variable recording if the token in each round was awarded to self or not
roundcat	A recategorization of the roundno variable to record waves of 8 rounds i.e. data was cumulated over 8 rounds. The cumulation is reflected in the ingroupfav and selfgiving variables
ingroupfav	Proportion of tokens given to ingroup in a wave of 8 rounds
selfgiving	Proportion of tokens given to self in a wave of 8 rounds
